# Supplementary material for: A phlorotannin nanoparticle–hydrogel composite for enhanced oral delivery and treatment of ulcerative colitis
Source: Royal Society of Chemistry journal article supplement (doi:10.1039/d4tb01811g), 2025-01-01
Supplement: d4tb01811g1.pdf [file d4tb01811g1.pdf]

1

## Supplementary Materials

### 2 **Phlorotannin Nanoparticle-Hydrogel Composite for Enhanced Oral Delivery and Treatment** 3 **of Ulcerative Colitis**

4 Wen Jiang<sup>a</sup>, Yu Xu<sup>b</sup>, Xin-Chuang Wang<sup>a</sup>, Di Wu<sup>a</sup>, Yi-Nan Du<sup>a</sup>, Jiang-Ning Hu<sup>a\*</sup>

5 <sup>a</sup> SKL of Marine Food Processing & Safety Control, National Engineering Research Center of  
6 Seafood, Collaborative Innovation Center of Seafood Deep Processing, School of Food Science and  
7 Technology, Dalian Polytechnic University, Dalian 116034, P. R. China

8 <sup>b</sup> College of Food and Health, Zhejiang A & F University, Hangzhou 311300, P. R. China

9 \* Corresponding author

10 E-mail: [hujiangning2005@hotmail.com](mailto:hujiangning2005@hotmail.com)

## 12 **2. Materials and methods**

### 13 2.1 Characterizations of nanoparticles

14 PT NPs morphologies were observed using a JSM-7800F scanning electron microscope (SEM) and  
15 a JEM2100F transmission electron microscope (TEM) (JEOL, Japan). The elemental content of PT  
16 NPs was quantified by X-Max 50 energy dispersive spectroscopy (EDS) (Oxford Instruments, UK).  
17 The structures of PT and PT NPs were analyzed by infrared spectroscopy (PerkinElmer Spectrum  
18 Two FT-IR spectrometer, Japan). A UV-visible spectrophotometer (LAMBDA 35, Japan) with a  
19 wavelength range of 190 to 700 nm was used to measure the UV-visible spectra of PT and PT NPs.  
20 The crystal structures of PT and PT NPs were analyzed by XRD-7000 X-ray diffractometer (XRD)  
21 (Shimadzu, Japan). Particle size, zeta potential, and PDI of PT NPs were measured using a ZS  
22 XPLOERER laser particle size analyzer. Additionally, PT concentrations ranging from 0.5 to 2.5  
23 mg/mL were used to prepare different concentrations of PT NPs. UV and XRD analyses were  
24 performed to investigate whether different concentrations of PT would affect the properties of the  
25 formed nanoparticles.

### 26 2.2 Stability of nanoparticles

27 The stability of PT NPs was evaluated under various conditions. For storage stability, PT NPs  
28 dispersion was prepared, and the particle size and polydispersity index (PDI) were measured at 0,  
29 2, 4, 6, and 8-day intervals. For salt ion stability, PT NPs were dissolved in 0, 0.1, 0.2, 0.3, and 0.4  
30 M NaCl solutions. After 1 h at room temperature, the particle size and PDI were measured using a  
31 ZS XPLOERER laser particle size analyzer (Malvern Instruments Ltd.). Photothermal stability was  
32 assessed through photostability and thermal stability tests. For photostability, PT NPs solution  
33 bottles were placed in a UV radiation chamber, and PT content was determined at various time

34 intervals. For thermal stability, PT NPs solutions were placed in a water bath at different  
35 temperatures (25, 40, 50, 60, 70, and 80 °C) for 12 h. PT content was determined using a microplate  
36 reader after cooling to room temperature.

### 37 2.3 Rheological Characterization

38 A TA Rheometer was used to test the rheological properties of the hydrogels. A 20 mm parallel  
39 plate fixture was chosen for the tests and the gap of the measurement cell was set at 1.0 mm. The  
40 rheometer temperature was set at 25 °C to measure the change in viscosity with shear rate. Shear  
41 rates ranged from approximately 1 s<sup>-1</sup> to 100 s<sup>-1</sup>. Rheological profiles were analysed by plotting  
42 viscosity-shear rate curves.

### 43 2.4 Cell Culture

44 RAW264.7 cells were incubated at 37°C in a 5% CO<sub>2</sub> incubator. DMEM medium supplemented  
45 with antibiotics (100 µg/mL streptomycin and 100 U/mL penicillin) and serum (v/v=1:10) was used  
46 to culture the cells.

### 47 2.5 Evaluation of cellular uptake capacity

48 RAW264.7 cells were inoculated into containers (1 × 10<sup>6</sup> cells/well) and cultured for 24 h. The cells  
49 were then treated with FITC-labelled PT, PT NPs, and PT NPs-Gel for 3 h. followed by PBS  
50 washing. They were then fixed with 4% paraformaldehyde for 15 min and washed twice with PBS.  
51 Subsequently, DAPI was used to stain the cell nuclei for 15 min and washed again with PBS.  
52 Qualitative and quantitative analysis of cell uptake using confocal laser microscopy (SP8, Leica,  
53 Wetzlar, Germany) and flow cytometry (FACSVerse, BD, USA).

### 54 2.6 Animals

55 Male Balb/c mice (6-8 weeks of age) were purchased from Liaoning Changsheng Biotechnology

56 Co., Ltd. (Benxi, China). All animal managements and experimental protocols were approved by  
57 the Experimental Animal Ethics Committee of the National Engineering Research Center of  
58 Seafood of Dalian Polytechnic University (Dalian, China; Animal Ethics Review Approval  
59 Number: DLPU2023071). Before the experiment, the mice were acclimatized and fed for 7 days.

## 60 2.7 Biological distribution

61 First, FITC-loaded PT NPs (FITC NPs) and PT NPs-Gel (FITC NPs-Gel) were prepared by the  
62 method for the preparation of PT NPs, with FITC instead of PT. Balb/c mice were randomly divided  
63 into three groups. After acclimatization for 7 days of feeding, a UC model was established. The  
64 mice were given distilled water containing 3% DSS for 7 consecutive days. FITC, FITC NPs, and  
65 FITC NPs-Gel were orally administered to the respective groups. The mice were then euthanized  
66 and their intestines were taken at specific time points (2, 6, 12, 24 h). A multifunctional *in vivo*  
67 imager (MIIS XFP-BIX, Molecular Devices, USA) was used to evaluate the biodistribution of the  
68 different substances in the intestine.

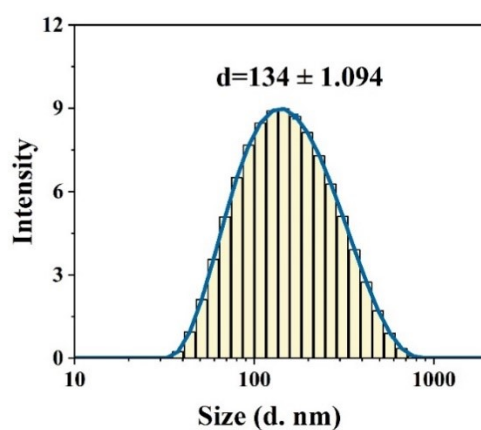

69

70 Fig. S1 Particle size distribution of PT NPs.

71

72

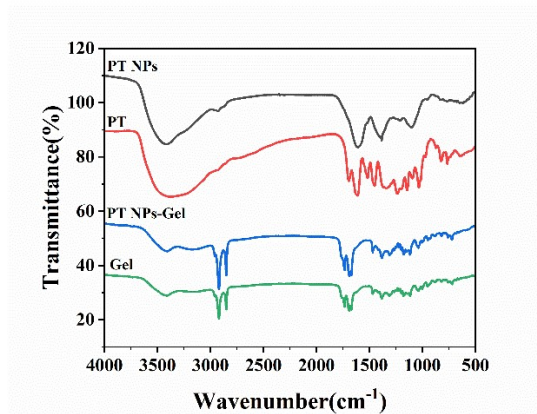

73

74 Fig. S2. Infrared spectra of different groups of samples: PT, PT NPs, PTNPs-Gel and Gel.

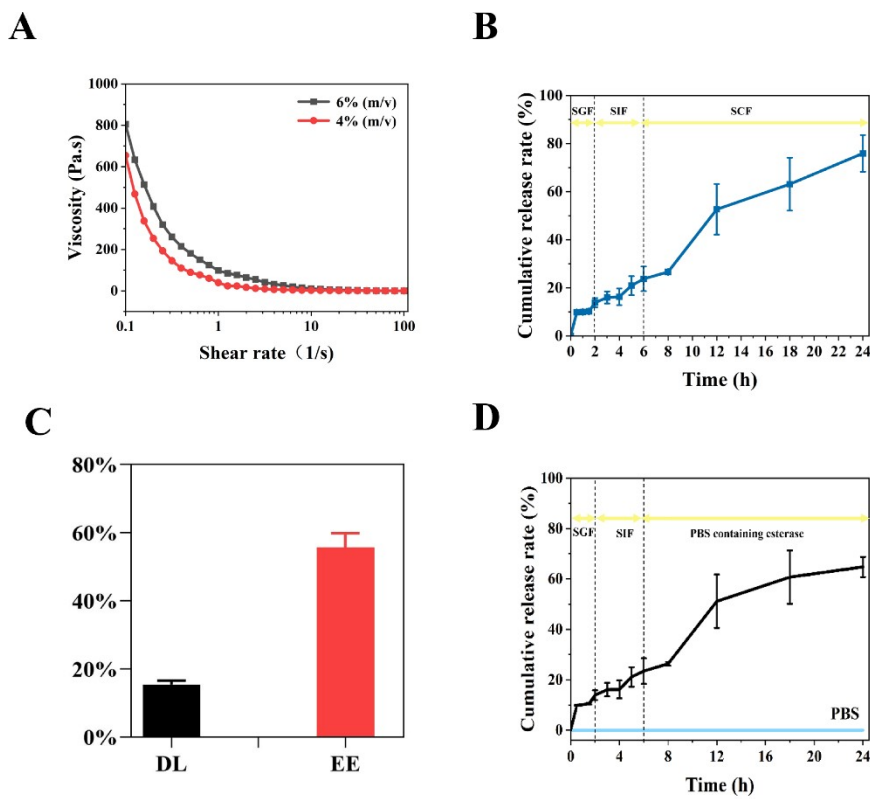

75

76 Fig. S3 Characterization of PTNPs-Gel. (A) Rheological properties of hydrogels with different  
 77 concentrations. (B) Release of PT from PTNPs-Gel *in vitro*. (C) Loading efficiency and  
 78 encapsulation efficiency of PTNPs-Gel. (D) Cumulative release of hydrogels in PBS vs. PBS  
 79 containing esterase. Esterase ( $\geq 20$ units/mg solid, porcine liver) was added at hour 6.  
 80

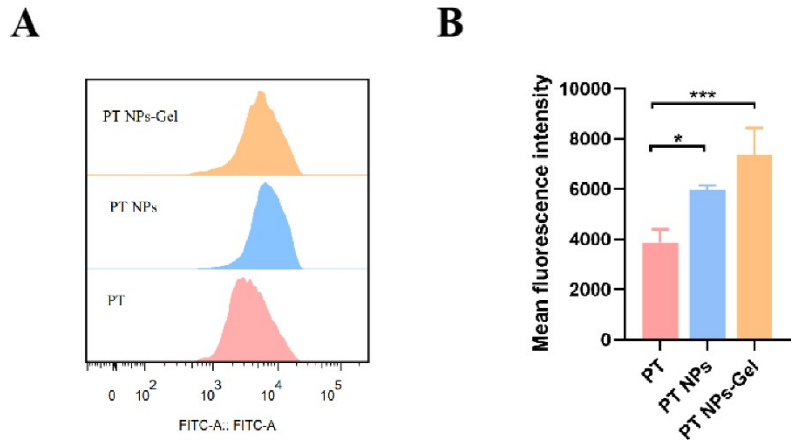

81

82 Fig. S4 RAW264.7 Quantitative cellular uptake of PT, PTNPs, PTNPs-Gel by RAW264.7 cells.

83 (n=3)

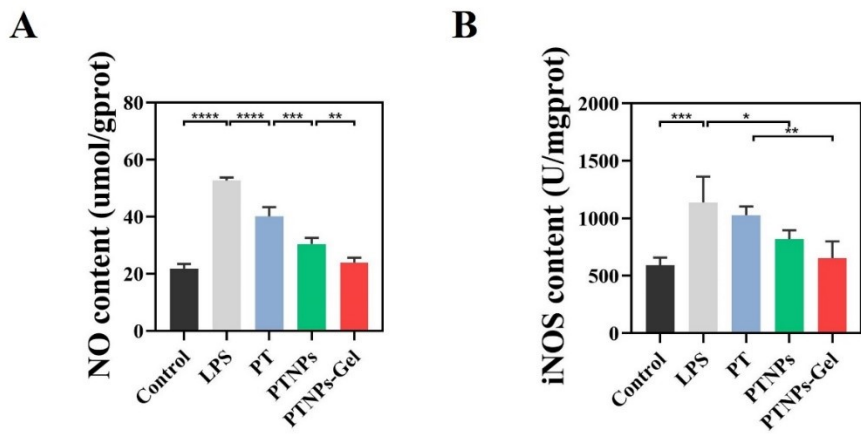

84

85 Fig. S5 The levels of (A) NO and (B) iNOS in RAW264.7 cells treated with different samples.

86 The data are expressed as means  $\pm$  SD (n = 3). \* $p$  < 0.05, \*\* $p$  < 0.01, \*\*\* $p$  < 0.001, \*\*\*\* $p$  <

87 0.0001.

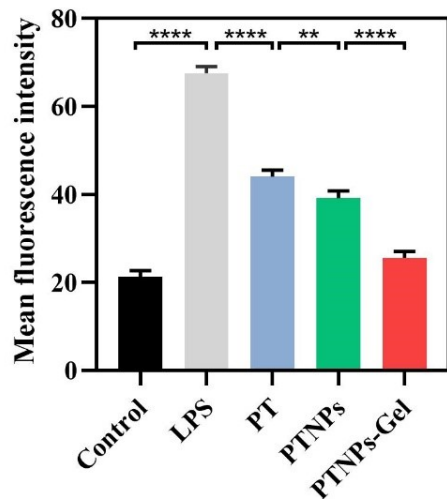

88

89 Fig. S6 Average fluorescence intensity of intracellular ROS in RAW264.7 cells treated  
 90 with PT, PT NPs, and PT NPs-Gel. The data are expressed as means  $\pm$  SD (n = 3). \**p*  
 91 < 0.05, \*\**p* < 0.01, \*\*\**p* < 0.001, \*\*\*\**p* < 0.0001.

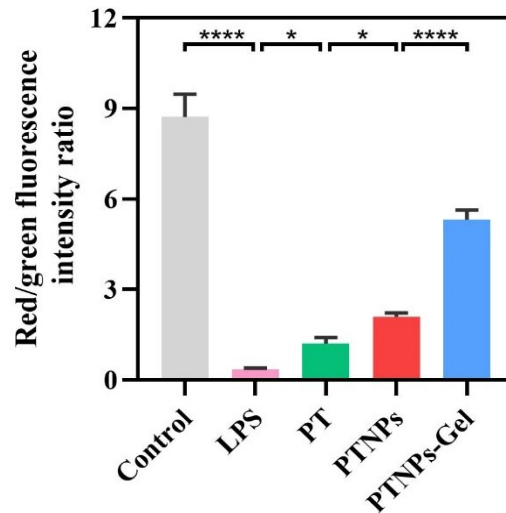

92

93 Fig. S7 The ratio of red/green fluorescence intensity in RAW264.7 cells treated with PT, PT NPs,  
 94 and PT NPs-Gel. The data are expressed as means  $\pm$  SD (n = 3). \**p* < 0.05, \*\**p* < 0.01, \*\*\**p* <  
 95 0.001, \*\*\*\**p* < 0.0001.

96

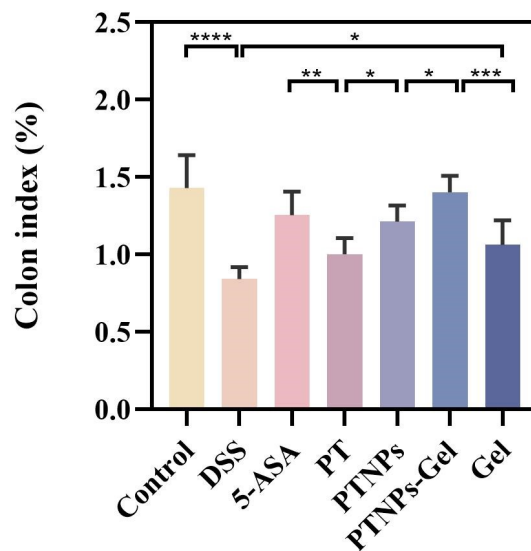

97

98 Fig. S8 Colon index of UC mice after different sample treatments. The values are mean  $\pm$ SD (n =  
 99 5). \* *p* < 0.05, \*\* *p* < 0.01, \*\*\* *p* < 0.001 and \*\*\*\* *p* < 0.0001.

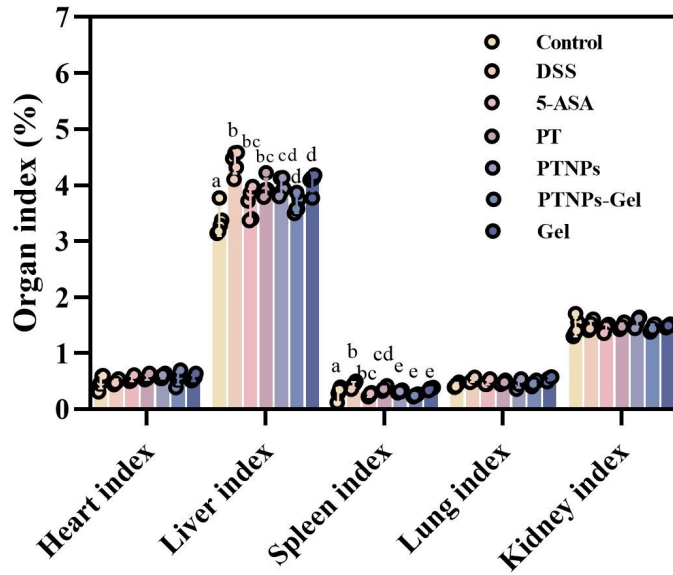

100

101 Fig. S9 Organ index of UC mice after different sample treatments. The values are mean  $\pm$  SD (n =  
 102 5). \* p < 0.05, \*\* p < 0.01, \*\*\* p < 0.001 and \*\*\*\* p < 0.0001.

**A**

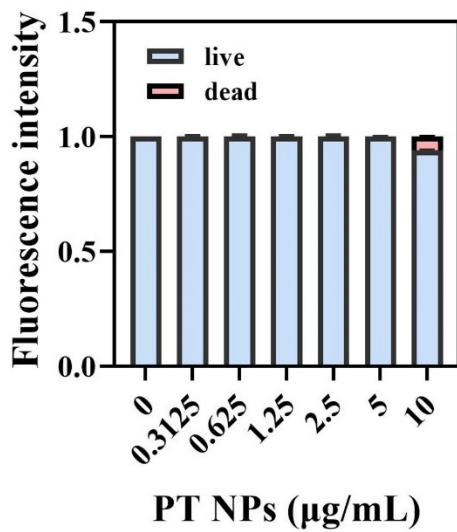

**B**

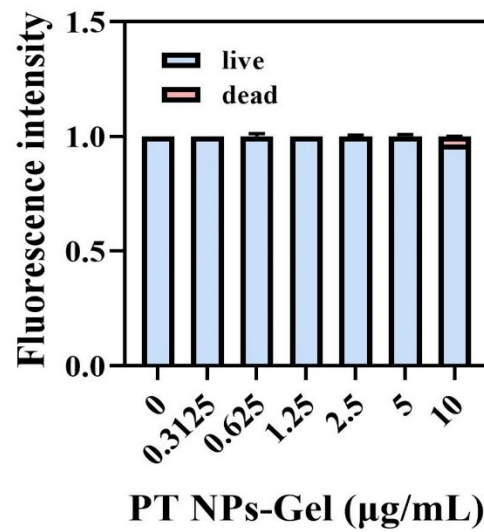

103

104 Fig. S10 In live/dead staining assay, the quantification of fluorescence intensity of (A) PT NPs and  
 105 (B) PT NPs-Gel groups was analyzed by Image J software. The data are expressed as means  $\pm$  SD  
 106 (n = 3). \*p < 0.05, \*\*p < 0.01, \*\*\*p < 0.001, \*\*\*\*p < 0.0001.

107
